# Supplementary material for: A Glow before Darkness: Toxicity of Glitter Particles to Marine Invertebrates
Source: MDPI journal article supplement (doi:10.3390/toxics11070617), 2023-07-16
Supplement: s1 [file s1]

**A glow before darkness: toxic effects of glitter particles to marine invertebrates**

Denis Moledo de Souza Abessa<sup>1\*</sup>, Caio Cesar-Ribeiro<sup>1,3</sup>; Letícia França Albanit<sup>1</sup>; Pedro Henrique Paixão de Moura<sup>1</sup>; Vitória Soares Nogueira<sup>1</sup>, Felipe Teixeira Santana<sup>1,2</sup>, Kainã Fagundes<sup>2</sup>, Maysa Ueda de Carvalho<sup>1</sup>, Otto Patrão de Oliveira Muller<sup>3</sup>

**Supplementary Material**

**Table S1.** Grain-size distribution and classification of green and white glitter particles.

| Grain size distribution statistics (Phi)  | Glitter type |       |
|-------------------------------------------|--------------|-------|
|                                           | Green        | White |
| Mean diameter                             | 5.52         | 3.94  |
| Standard deviation                        | 0.94         | 0.84  |
| Skewness                                  | 0.59         | 0.90  |
| Kurtosis                                  | 3.53         | 4.19  |
| <b>Particle size range (Wentworth)</b>    |              |       |
| Medium sand (250 - 600 $\mu\text{m}$ )    | 0.00         | 0.32  |
| Fine sand(125 - 250 $\mu\text{m}$ )       | 0.00         | 17.28 |
| Very fine sand (63 - 125 $\mu\text{m}$ )  | 4.24         | 43.93 |
| Coarse silt (31 - 63 $\mu\text{m}$ )      | 29.51        | 26.62 |
| Medium silt (15.6 - 31 $\mu\text{m}$ )    | 39.21        | 7.95  |
| Fine silt (7.8 - 15.6 $\mu\text{m}$ )     | 20.66        | 3.12  |
| Very fine silt (3.9 - 7.8 $\mu\text{m}$ ) | 4.94         | 0.73  |
| Clay (<0.06 $\mu\text{m}$ )               | 1.43         | 0.11  |

**Table S2.** Composition of the glitters transcribed from the labels of each package. (CI 77019 = mica; CI 77891 = Titanium Dioxide).

| Glitter type                  | Green Glitter                | White Glitter |
|-------------------------------|------------------------------|---------------|
| <b>Formulation components</b> | BHT                          | BHT           |
|                               | Propylparaben                | Propylparaben |
|                               | Talc                         | Talc          |
|                               | Paraffinum Liquidum          | CI 77019      |
|                               | Methylparaben                | CI 77891      |
|                               | Caprylic/Capric Triglyceride |               |
|                               | Hydrolyzed collagen          |               |
|                               | Magnesium Carbonate          |               |
|                               | Cyclomethicone               |               |
|                               | Serica Powder                |               |
|                               | Zinc Stearate                |               |
|                               | Dimethicone                  |               |
|                               | Crosspolymer                 |               |

Table S3 – Result of the toxicity test with reference substance (Sodium Dodecyl sulfonate – SDS) and embryos of *Arbacia lixula*. The calculated EC50 was 1.56 (1.00 – 2.12) mg/L.

| Concentration (mg/L) | Normal development (%) |    |    |    |      |      |
|----------------------|------------------------|----|----|----|------|------|
|                      | R1                     | R2 | R3 | R4 | Mean | SD   |
| Control              | 93                     | 96 | 81 | 95 | 91.3 | 6.9  |
| 0.5                  | 82                     | 82 | 68 | 64 | 74.0 | 9.4  |
| 1                    | 62                     | 80 | 82 | 75 | 74.8 | 9.0  |
| 2                    | 0                      | 4  | 3  | 28 | 8.8  | 12.9 |
| 3                    | 0                      | 0  | 0  | 0  | 0    | 0    |
| 5                    | 0                      | 0  | 0  | 0  | 0    | 0    |

Table S4. – Result of the toxicity test with reference substance (Sodium Dodecyl sulfonate – SDS) and embryos of *Echinometra lucunter*. The calculated EC50 was 2.31 (1.97 – 2.63) mg/L.

| Concentration (mg/L) | Normal development (%) |     |    |    |      |      |
|----------------------|------------------------|-----|----|----|------|------|
|                      | R1                     | R2  | R3 | R4 | Mean | SD   |
| Control              | 98                     | 98  | 92 | 95 | 95.8 | 2.9  |
| 0.5                  | 99                     | 98  | 94 | 92 | 95.8 | 3.3  |
| 1                    | 99                     | 100 | 98 | 98 | 98.8 | 1.0  |
| 2                    | 40                     | 58  | 70 | 78 | 61.5 | 16.5 |
| 3                    | 2                      | 4   | 23 | 4  | 8.3  | 9.9  |
| 5                    | 0                      | 0   | 0  | 0  | 0    | 0    |

Table S5 – Result of the toxicity test with reference substance (Sodium Dodecyl Sulfonate – SDS) and embryos of *Perna perna*. The calculated EC50 was 1.27 (0.70 – 1.84) mg/L.

| Concentration (mg/L) | Normal development (%) |    |    |    |      |      |
|----------------------|------------------------|----|----|----|------|------|
|                      | R1                     | R2 | R3 | R4 | Mean | SD   |
| Control              | 98                     | 95 | 99 | 96 | 92.5 | 7.3  |
| 0.5                  | 40                     | 73 | 72 | 56 | 69.8 | 10.2 |
| 1                    | 19                     | 41 | 12 | 42 | 63.0 | 7.3  |
| 2                    | 40                     | 33 | 29 | 12 | 44.0 | 8.5  |
| 3                    | 0                      | 0  | 0  | 0  | 20.0 | 15.3 |
| 5                    | 0                      | 0  | 0  | 0  | 0    | 0    |

Table S6 – Result of the toxicity test with Green glitter and embryos of *Arbacia lixula*.

| Concentration (mg/L) | Normal development (%) |    |    |    |      | Standard Deviation |
|----------------------|------------------------|----|----|----|------|--------------------|
|                      | R1                     | R2 | R3 | R4 | Mean |                    |
| Control              | 93                     | 96 | 81 | 95 | 91.3 | 6.9                |
| 50                   | 78                     | 66 | 83 | 76 | 75.8 | 7.1                |
| 100                  | 97                     | 88 | 93 | 91 | 92.3 | 3.8                |
| 200                  | 43                     | 64 | 76 | 72 | 63.8 | 14.7               |
| 300                  | 40                     | 28 | 74 | 53 | 48.8 | 19.7               |
| 400                  | 29                     | 6  | 9  | 0  | 11.0 | 12.6               |
| 500                  | 12                     | 0  | 0  | 0  | 3.0  | 6.0                |

Table S7 – Result of the toxicity test with Green glitter and embryos of *Echinometra lucunter*.

| Concentration (mg/L) | Normal development (%) |    |    |      | Standard Deviation |
|----------------------|------------------------|----|----|------|--------------------|
|                      | R1                     | R2 | R3 | Mean |                    |
| Control              | 73                     | 98 | 95 | 88.7 | 13.7               |
| 50                   | 16                     | 45 | 48 | 36.3 | 17.7               |
| 100                  | 41                     | 72 | 41 | 51.3 | 17.9               |
| 200                  | 24                     | 31 | 28 | 27.7 | 3.5                |
| 300                  | 1                      | 18 | 7  | 8.7  | 8.6                |
| 500                  | 0                      | 0  | 0  | 0    | 0                  |

Table S8 – Result of the toxicity test with Green glitter and embryos of *Perna perna*.

| Concentration (mg/L) | Normal development (%) |    |    |    |      | Standard Deviation |
|----------------------|------------------------|----|----|----|------|--------------------|
|                      | R1                     | R2 | R3 | R4 | Mean |                    |
| Control              | 97                     | 98 | 93 | 82 | 92.5 | 7.3                |
| 10                   | 70                     | 73 | 62 | 48 | 63.3 | 11.2               |
| 25                   | 45                     | 49 | 38 | 47 | 44.8 | 4.8                |
| 50                   | 21                     | 29 | 28 | 46 | 31.0 | 10.6               |
| 100                  | 9                      | 17 | 12 | 13 | 12.8 | 3.3                |
| 200                  | 0                      | 0  | 0  | 0  | 0    | 0                  |
| 500                  | 0                      | 0  | 0  | 0  | 0    | 0                  |

Table S9 – Result of the toxicity test with White glitter and embryos of *Echinometra lucunter*.

| Concentration (mg/L) | Normal development (%) |    |    |      |                    |
|----------------------|------------------------|----|----|------|--------------------|
|                      | R1                     | R2 | R3 | Mean | Standard Deviation |
| Control              | 98                     | 95 | 99 | 97.3 | 2.1                |
| 50                   | 73                     | 70 | 92 | 78.3 | 11.9               |
| 200                  | 87                     | 76 | 70 | 77.7 | 8.6                |
| 300                  | 63                     | 17 | 40 | 40.0 | 23.0               |
| 500                  | 7                      | 0  | 23 | 10.0 | 11.8               |

Table S10 – Result of the toxicity test with White glitter and embryos of *Perna perna*.

| Concentration (mg/L) | Normal development (%) |    |    |    |      | Standard Deviation |
|----------------------|------------------------|----|----|----|------|--------------------|
|                      | R1                     | R2 | R3 | R4 | Mean |                    |
| Control              | 97                     | 98 | 93 | 82 | 92.5 | 7.3                |
| 10                   | 44                     | 11 | 17 | 29 | 25.3 | 14.6               |
| 25                   | 35                     | 16 | 26 | 49 | 31.5 | 14.0               |
| 50                   | 35                     | 26 | 28 | 30 | 29.8 | 3.9                |
| 100                  | 32                     | 12 | 23 | 21 | 22.0 | 8.2                |
| 200                  | 1                      | 7  | 4  | 4  | 4.0  | 2.4                |
| 500                  | 1                      | 5  | 0  | 0  | 1.5  | 2.4                |

Table S11 – Result of the TIE approach using the Green glitter and embryos of *Arbacia lixula*. Gray cells indicate outliers.

| Treatment           | Normal development (%) |    |    |    |      | Standard Deviation |
|---------------------|------------------------|----|----|----|------|--------------------|
|                     | R1                     | R2 | R3 | R4 | Mean |                    |
| Baseline            | 12                     | 0  | 0  | 0  | 3.0  | 6.0                |
| Control             | 93                     | 96 | 81 | 95 | 91.3 | 6.9                |
| Control alcohol     | 90                     | 91 | 81 | 93 | 88.8 | 5.3                |
| Aeration            | 17                     | 88 | 50 | 90 | 76.0 | 25.7               |
| Thiosulfate         | 85                     | 67 | 67 | 21 | 73.0 | 10.4               |
| Control Thiosulfate | 99                     | 98 | 89 | 93 | 94.8 | 4.6                |
| EDTA                | 76                     | 77 | 65 | 62 | 70.0 | 7.6                |
| Control EDTA        | 95                     | 96 | 96 | 88 | 93.8 | 3.9                |
| Filtration          | 0                      | 0  | 0  | 0  | 0.0  | 0.0                |
| C18                 | 0                      | 0  | 9  | 10 | 4.8  | 5.5                |
| Control C18         | 99                     | 91 | 94 | 99 | 95.8 | 3.9                |

Table S12. Physical-chemical parameters of the test-suspensions during the toxicity test of green glitter using embryos of *Arbacia lixula*.

| <b>Treatment</b>       | <b>pH</b>      |              | <b>Sal</b>     |              | <b>OD (mg/L)</b> |              |
|------------------------|----------------|--------------|----------------|--------------|------------------|--------------|
|                        | <b>Inicial</b> | <b>Final</b> | <b>Inicial</b> | <b>Final</b> | <b>Inicial</b>   | <b>Final</b> |
| <b>Control water</b>   | 7.92           | 7.61         | 35             | 36           | 4.58             | 4.33         |
| <b>Control alcohol</b> | 7.80           | 7.77         | 35             | 35           | 4.12             | 4.02         |
| <b>50</b>              | 7.77           | 7.61         | 35             | 36           | 4.58             | 4.11         |
| <b>100</b>             | 7.64           | 7.38         | 35             | 35           | 4.43             | 4.09         |
| <b>200</b>             | 7.61           | 7.63         | 34             | 36           | 4.76             | 4.55         |
| <b>300</b>             | 7.60           | 7.66         | 34             | 36           | 4.35             | 4.13         |
| <b>400</b>             | 7.60           | 7.71         | 34             | 35           | 5.92             | 5.21         |
| <b>500</b>             | 7.57           | 7.59         | 35             | 36           | 4.11             | 4.01         |

Table S13. Physical-chemical parameters of the test-suspensions during the toxicity test of green glitter using embryos of *Perna perna*.

| <b>Treatment</b> | <b>pH</b>      |              | <b>Sal</b>     |              | <b>OD (mg/L)</b> |              |
|------------------|----------------|--------------|----------------|--------------|------------------|--------------|
|                  | <b>Inicial</b> | <b>Final</b> | <b>Inicial</b> | <b>Final</b> | <b>Inicial</b>   | <b>Final</b> |
| <b>Control</b>   | 7.46           | 7.36         | 35             | 35           | 6.26             | 5.12         |
| <b>10</b>        | 7.20           | 7.20         | 35             | 35           | 6.16             | 5.18         |
| <b>25</b>        | 7.07           | 7.00         | 35             | 35           | 6.11             | 4.93         |
| <b>50</b>        | 7.37           | 7.29         | 35             | 35           | 6.04             | 6.02         |
| <b>100</b>       | 7.54           | 7.60         | 35             | 35           | 5.88             | 6.10         |
| <b>200</b>       | 7.48           | 7.55         | 35             | 35           | 5.93             | 5.99         |
| <b>500</b>       | 7.28           | 7.36         | 35             | 35           | 6.35             | 5.12         |

Table S14. Physical-chemical parameters of the test-suspensions during the toxicity test of green glitter using embryos of *Echinometra lucunter*.

| <b>Treatment</b> | <b>pH</b>      |              | <b>Sal</b>     |              | <b>OD (mg/L)</b> |              |
|------------------|----------------|--------------|----------------|--------------|------------------|--------------|
|                  | <b>Inicial</b> | <b>Final</b> | <b>Inicial</b> | <b>Final</b> | <b>Inicial</b>   | <b>Final</b> |
| <b>Control</b>   | 7.98           | 8.01         | 34             | 34           | 6.46             | 4.32         |
| <b>50</b>        | 7.38           | 7.91         | 34             | 34           | 5.88             | 4.11         |
| <b>100</b>       | 7.63           | 7.66         | 34             | 34           | 5.92             | 4.11         |
| <b>200</b>       | 7.37           | 7.42         | 34             | 34           | 5.93             | 4.12         |
| <b>300</b>       | 7.54           | 7.33         | 34             | 34           | 6.04             | 4.12         |
| <b>500</b>       | 7.48           | 7.25         | 34             | 34           | 6.10             | 4.13         |

Table S15. Physical-chemical parameters of the test-suspensions during the toxicity test of white glitter using embryos of *Perna perna*.

| <i>Treatment</i> | pH      |       | Sal     |       | OD (mg/L) |       |
|------------------|---------|-------|---------|-------|-----------|-------|
|                  | Inicial | Final | Inicial | Final | Inicial   | Final |
| <b>Control</b>   | 7.46    | 7.36  | 35      | 35    | 6.26      | 5.12  |
| <b>10</b>        | 7.35    | 7.02  | 35      | 35    | 6.20      | 5.13  |
| <b>25</b>        | 7.41    | 7.99  | 35      | 35    | 6.04      | 5.19  |
| <b>50</b>        | 7.52    | 7.88  | 35      | 35    | 5.93      | 5.22  |
| <b>100</b>       | 7.66    | 7.90  | 35      | 35    | 6.10      | 4.98  |
| <b>200</b>       | 7.42    | 7.12  | 35      | 35    | 5.99      | 4.66  |
| <b>500</b>       | 7.82    | 7.55  | 35      | 35    | 6.02      | 5.99  |

Table S16. Physical-chemical parameters of the test-suspensions during the toxicity test of white glitter using embryos of *Echinometra lucunter*.

| <i>Treatment</i> | pH      |       | Sal     |       | OD (mg/L) |       |
|------------------|---------|-------|---------|-------|-----------|-------|
|                  | Inicial | Final | Inicial | Final | Inicial   | Final |
| <b>Control</b>   | 7.98    | 8.01  | 34      | 34    | 6.46      | 4.32  |
| <b>50</b>        | 7.85    | 7.98  | 34      | 35    | 6.12      | 4.33  |
| <b>200</b>       | 7.41    | 7.33  | 34      | 34    | 6.26      | 4.35  |
| <b>300</b>       | 7.68    | 7.66  | 34      | 34    | 5.44      | 4.43  |
| <b>500</b>       | 7.58    | 7.55  | 34      | 34    | 5.31      | 4.51  |

Table S17. Physical-chemical parameters of the test-suspensions during the toxicity test of green glitter using embryos of *Arbacia lixula*, in the TIE approach

| <i>Treatment</i>           | pH      |       | Sal     |       | OD (mg/L) |       |
|----------------------------|---------|-------|---------|-------|-----------|-------|
|                            | Inicial | Final | Inicial | Final | Inicial   | Final |
| <b>Control</b>             | 7.92    | 7.61  | 35      | 36    | 4.58      | 4.33  |
| <b>Control alcohol</b>     | 7.80    | 7.77  | 35      | 35    | 4.12      | 4.02  |
| <b>Control Thiosulfate</b> | 7.97    | 7.85  | 35      | 35    | 5.14      | 5.12  |
| <b>Thiosulfate</b>         | 7.66    | 7.60  | 35      | 35    | 5.22      | 4.51  |
| <b>Control EDTA</b>        | 7.90    | 7.66  | 35      | 35    | 4.20      | 4.23  |
| <b>EDTA</b>                | 7.47    | 7.60  | 35      | 35    | 5.14      | 4.66  |
| <b>Control C18</b>         | 7.57    | 7.32  | 35      | 35    | 4.88      | 4.32  |
| <b>C18</b>                 | 7.71    | 7.57  | 35      | 35    | 4.99      | 5.01  |
| <b>Filtration</b>          | 7.42    | 8.08  | 35      | 35    | 4.66      | 4.12  |
| <b>Aeration</b>            | 7.60    | 7.58  | 35      | 35    | 5.96      | 4.98  |



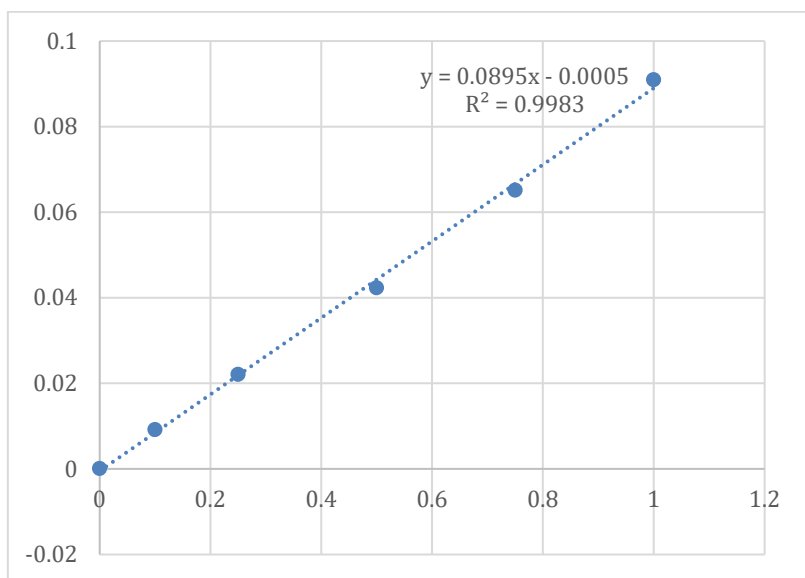

Figure S1. Calibration curve obtained for Ag during the chemical analysis.

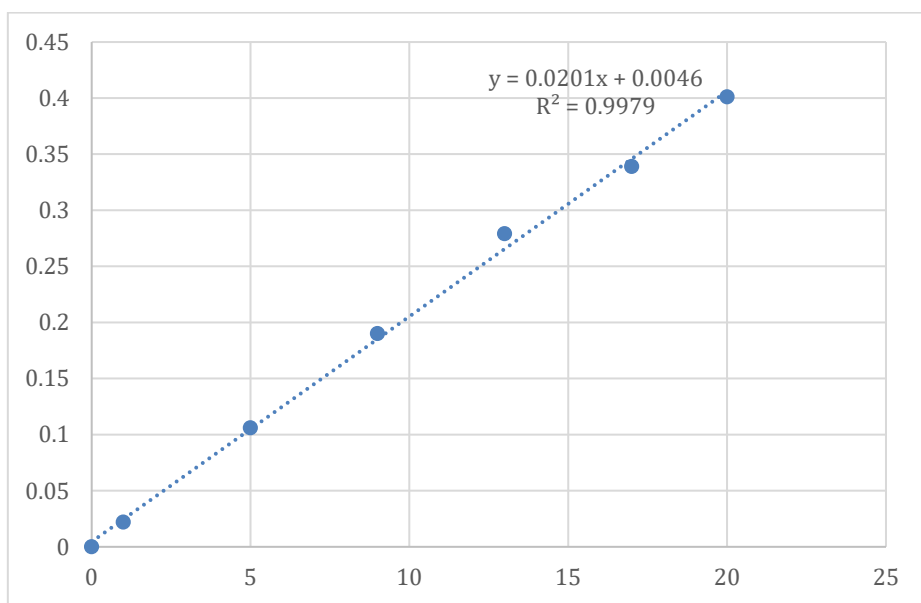

Figure S2. Calibration curve obtained for Ca during the chemical analysis.

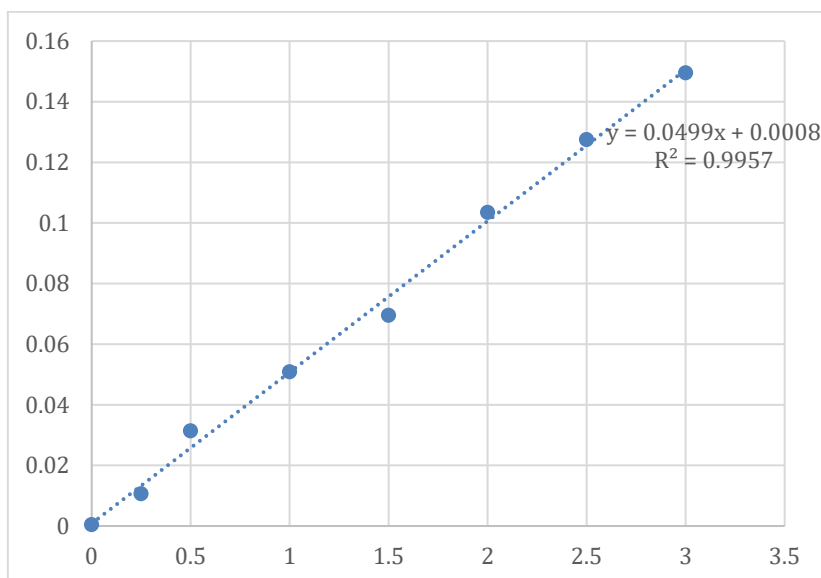

Figure S3. Calibration curve obtained for Fe during the chemical analysis.

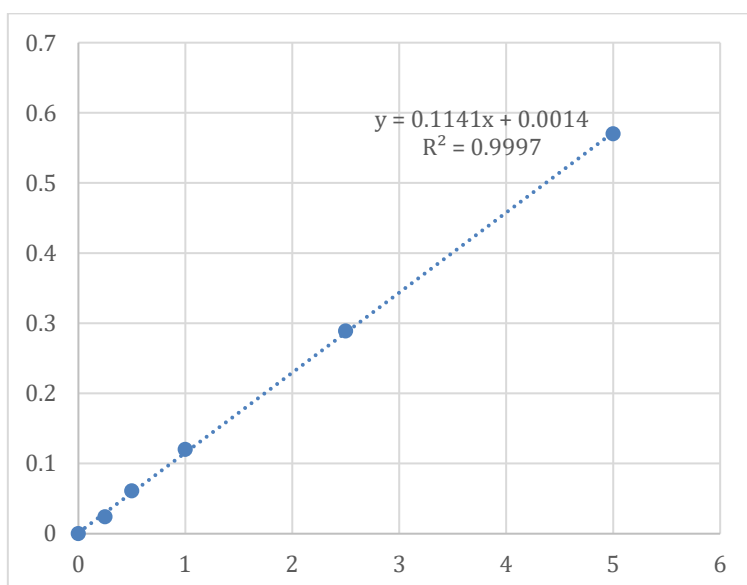

Figure S4. Calibration curve obtained for Mg during the chemical analysis.

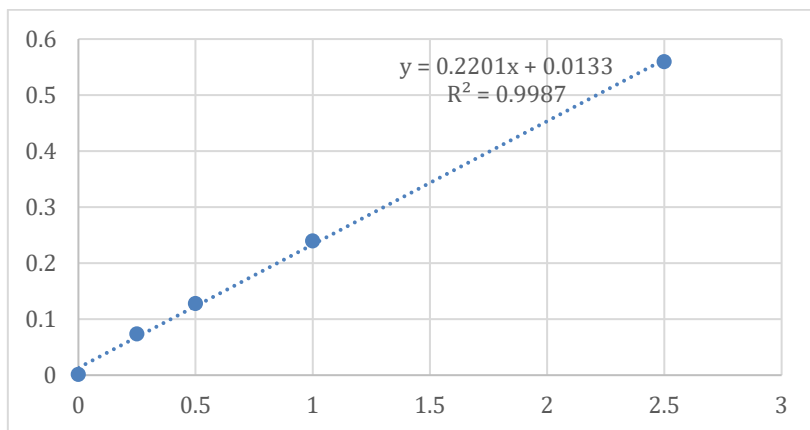

Figure S5. Calibration curve obtained for Zn during the chemical analysis.

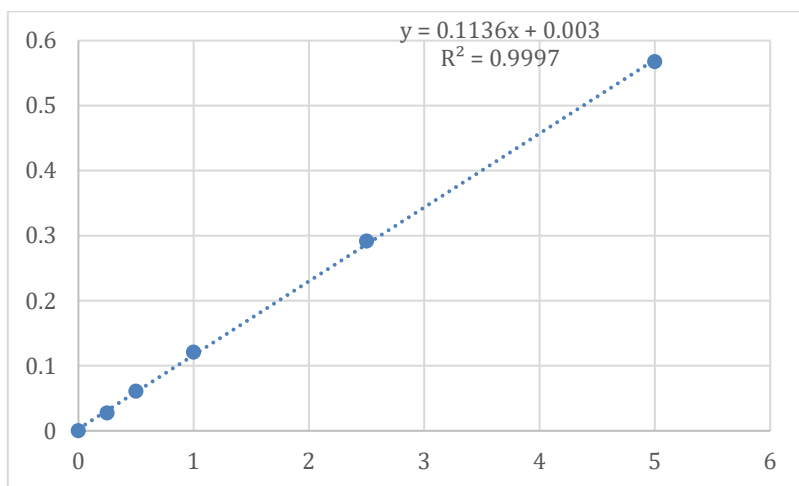

Figure S6. Calibration curve obtained for Cu during the chemical analysis.
